# Supplementary material for: Effect of Different Ambient Temperatures on Reproductive Outcome and Stress Level of Lactating Females in Two Mouse Strains
Source: MDPI journal article supplement (doi:10.3390/ani12162141), 2022-08-20
Supplement: s1 [file s1]

|             |      | 20°C | 25°C | 30°C |
|-------------|------|------|------|------|
| temperature | mean | 19.8 | 25.0 | 31.4 |
|             | SD   | 0.7  | 0.6  | 1.3  |
| humidity    | mean | 48.1 | 38.7 | 36.5 |
|             | SD   | 2.2  | 1.2  | 5.1  |
