# Supplementary figures and images for: Effect of Different Ambient Temperatures on Reproductive Outcome and Stress Level of Lactating Females in Two Mouse Strains
Source: MDPI journal article supplement (doi:10.3390/ani12162141), 2022-08-20

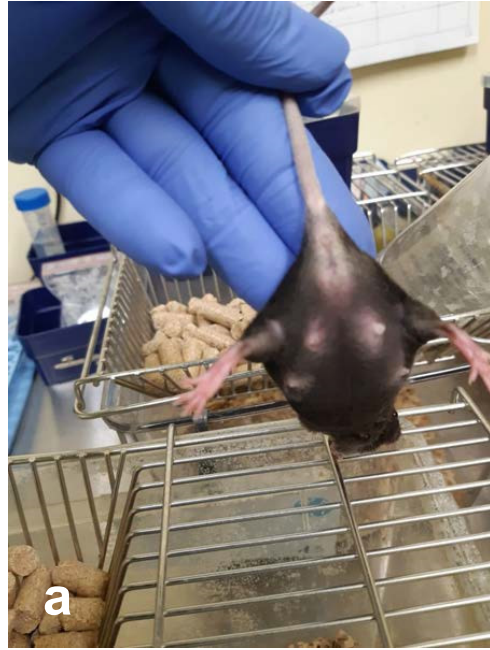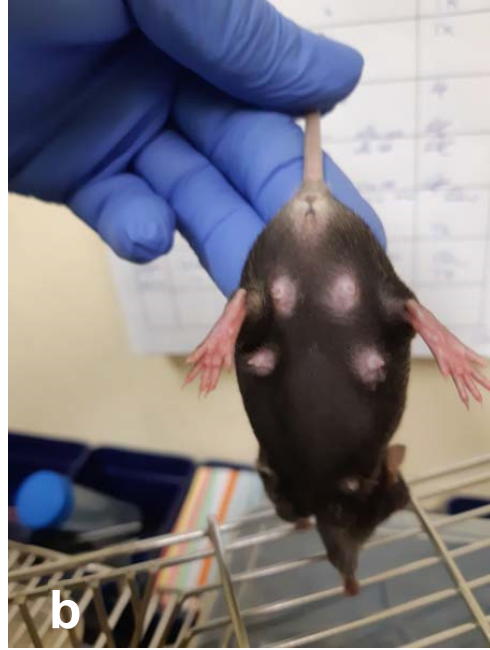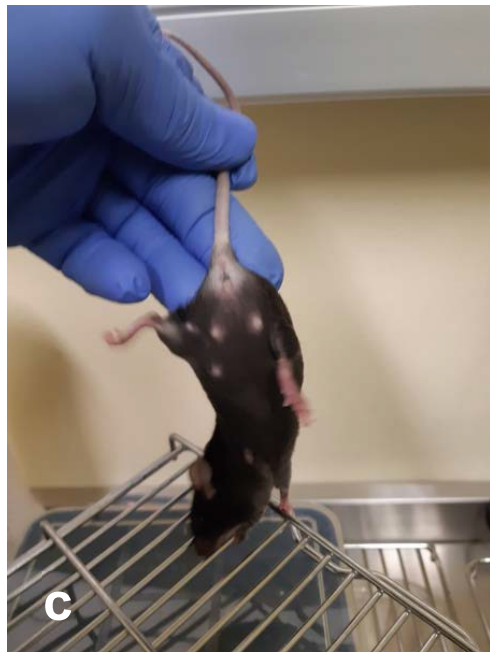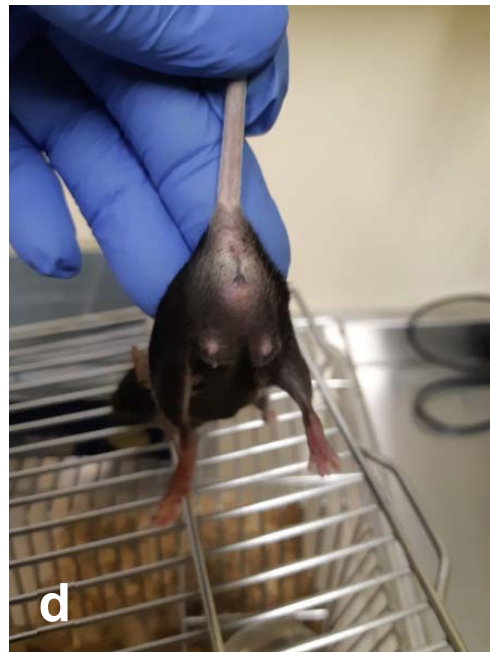

Supplement: s1 [file s1]

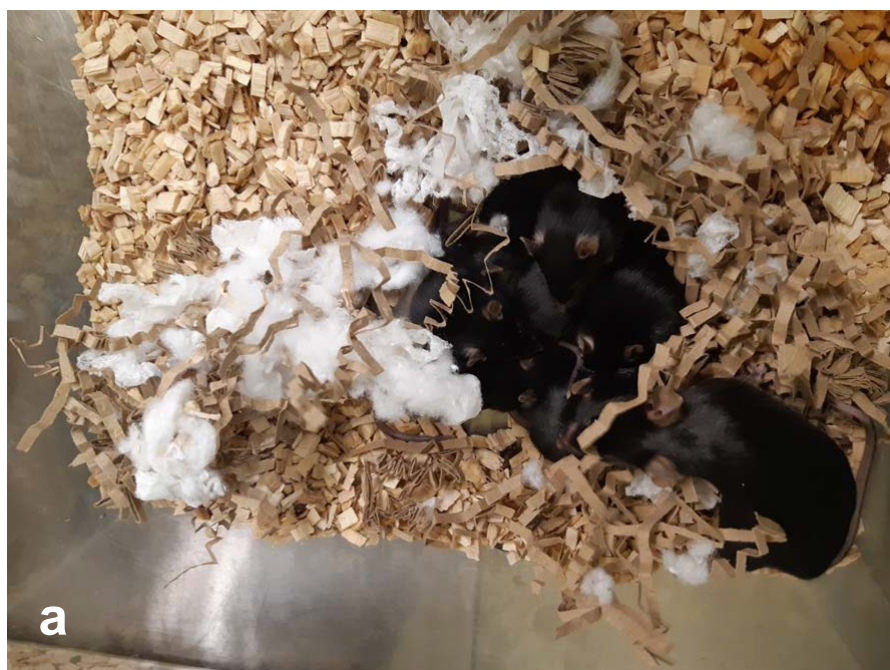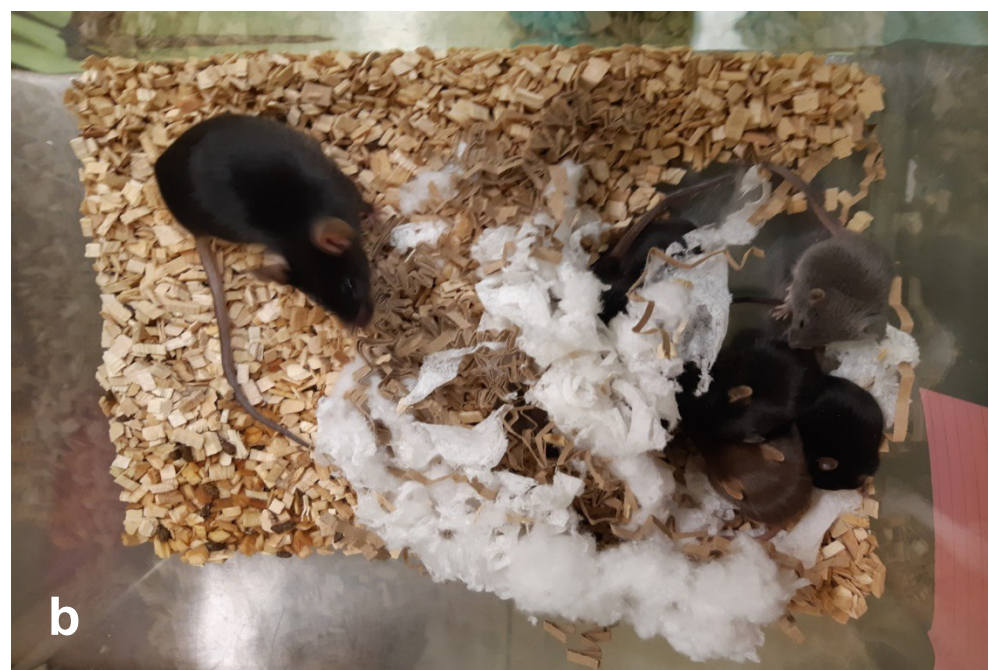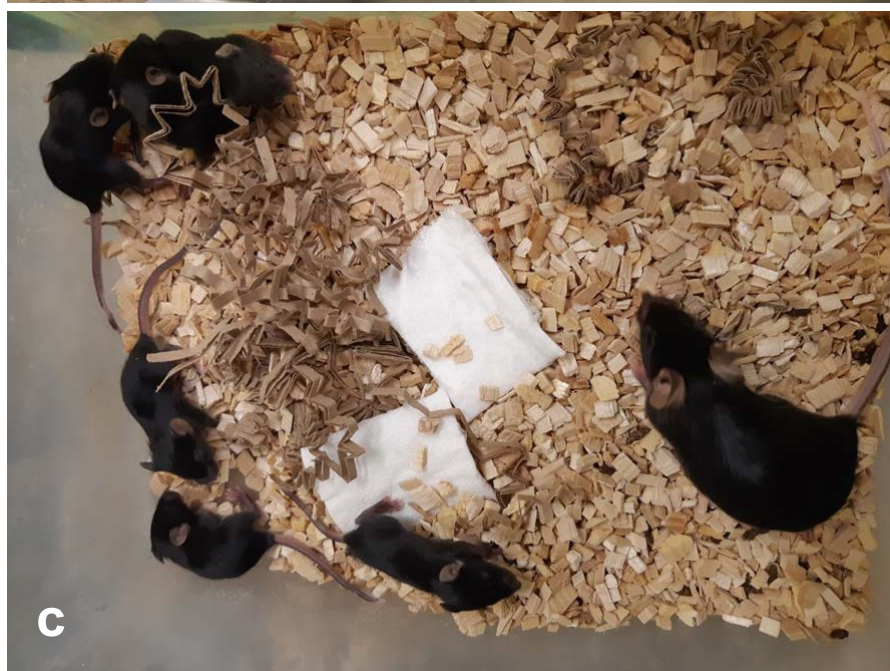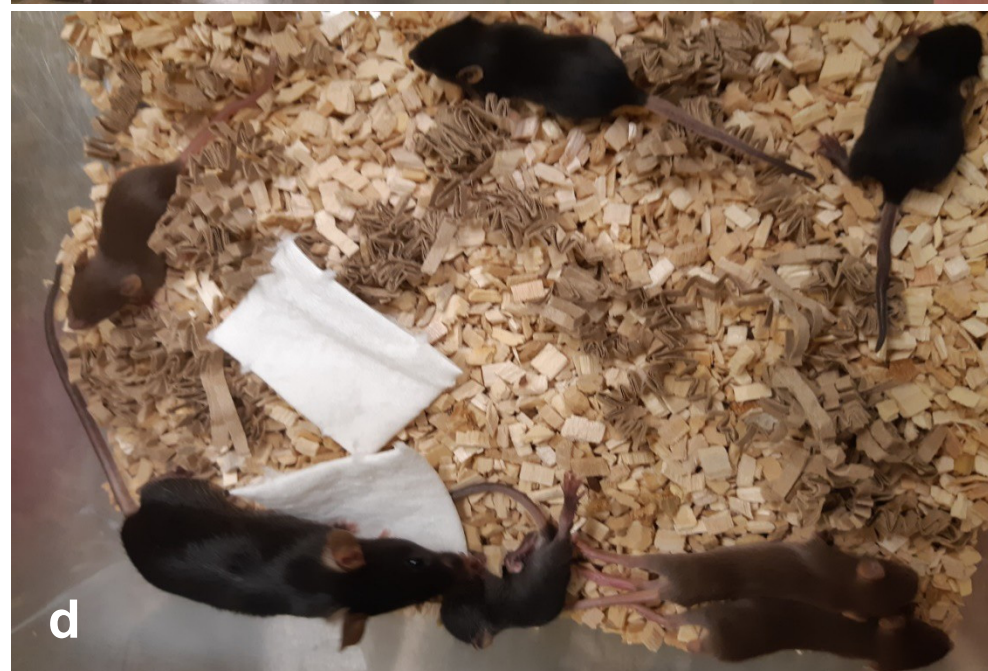

Supplement: s1 [file s1]
